# Supplementary material for: Revisiting brain rewiring and plasticity in children born without corpus callosum
Source: PubMed Central journal article supplement — Dev Sci. 2021 Jun 1;24(6):e13126. doi: 10.1111/desc.13126 (PMC8596429; doi:10.1111/desc.13126), 2021-06-01

## Supplementary Material

### Supplementary Tables

**Table S1.** List of the 20 homotopic regions from the Brainnetome atlas (Fan et al., 2016) in the parietal cortices that were used as atlas-based FC seed

| Gyrus                    | Label left hemisphere | Label right hemisphere | Anatomical and modified Cyto-architectonic descriptions | Left hemisphere MNI(X,Y,Z) | Right hemisphere MNI(X,Y,Z) |
|--------------------------|-----------------------|------------------------|---------------------------------------------------------|----------------------------|-----------------------------|
| Superior Parietal Lobule | 125                   | 126                    | <i>A7r, rostral area 7</i>                              | -16, -60, 63               | 19, -57, 65                 |
|                          | 127                   | 128                    | <i>A7c, caudal area 7</i>                               | -15, -71, 52               | 19, -69, 54                 |
|                          | 129                   | 130                    | <i>A5l, lateral area 5</i>                              | -33, -47, 50               | 35, -42, 54                 |
|                          | 131                   | 132                    | <i>A7pc, postcentral area 7</i>                         | -22, -47, 65               | 23, -43, 67                 |
|                          | 133                   | 134                    | <i>A7ip, intraparietal area 7(hIP3)</i>                 | -27, -59, 54               | 31, -54, 53                 |
| Inferior Parietal Lobule | 135                   | 136                    | <i>A39c, caudal area 39(PGp)</i>                        | -34, -80, 29               | 45, -71, 20                 |
|                          | 137                   | 138                    | <i>A39rd, rostromedial area 39(Hip3)</i>                | -38, -61, 46               | 39, -65, 44                 |
|                          | 139                   | 140                    | <i>A40rd, rostromedial area 40(PFt)</i>                 | -51, -33, 42               | 47, -35, 45                 |
|                          | 143                   | 144                    | <i>A39rv, rostroventral area 39(PGa)</i>                | -47, -65, 26               | 53, -54, 25                 |
| Precuneus                | 147                   | 148                    | <i>A7m, medial area 7(PEp)</i>                          | -5, -63, 51                | 6, -65, 51                  |

**Table S2.** Using the atlas-based FC seeds approach, group differences in FC of left and right seeds in the parietal cortex between children with and without the ventral forebrain bundles retrieved (crossing the midline in the anterior commissure)

| Labels of atlas regions in left and right hemispheres | Independent-sample t-test for the comparison in FC between left and right seeds (mentioned in left column) between children with and without the ventral forebrain bundles retrieved |
|-------------------------------------------------------|--------------------------------------------------------------------------------------------------------------------------------------------------------------------------------------|
| lh.125 <> rh.126                                      | t(14)=1.114, p=0.284                                                                                                                                                                 |
| lh.127 <> rh.128                                      | t(14)=0.238, p=0.815                                                                                                                                                                 |
| lh.129 <> rh.130                                      | t(14)=0.811, p=0.431                                                                                                                                                                 |
| lh.131 <> rh.132                                      | t(14)=0.949, p=0.359                                                                                                                                                                 |
| lh.133 <> rh.134                                      | t(14)=1.382, p=0.189                                                                                                                                                                 |
| lh.135 <> rh.136                                      | t(14)=1.163, p=0.264                                                                                                                                                                 |
| lh.137 <> rh.138                                      | t(14)=0.994, p=0.337                                                                                                                                                                 |
| lh.139 <> rh.140                                      | t(14)=0.325, p=0.750                                                                                                                                                                 |
| lh.143 <> rh.144                                      | t(14)= 1.372, p=0.192                                                                                                                                                                |
| lh.147 <> rh.148                                      | t(14)=0.707, p=0.491                                                                                                                                                                 |

Note: lh left hemisphere; rh right hemisphere.

**Table S3.** Using the atlas-based FC seeds approach, group differences in FC of left and right seeds in the parietal cortex between children with and without the midbrain bundles retrieved (crossing the midline in the posterior commissure)

| Labels of atlas regions in left and right hemispheres | Independent-sample t-test for the comparison in FC between left and right seeds (mentioned in left column) between children with and without the midbrain bundles retrieved |
|-------------------------------------------------------|-----------------------------------------------------------------------------------------------------------------------------------------------------------------------------|
| lh.125 <> rh.126                                      | t(14)=0.494, p=0.629                                                                                                                                                        |
| lh.127 <> rh.128                                      | t(14)=-0.194, p=0.849                                                                                                                                                       |
| lh.129 <> rh.130                                      | t(14)=-0.23, p=0.982                                                                                                                                                        |
| lh.131 <> rh.132                                      | t(14)=0.277, p=0.786                                                                                                                                                        |
| lh.133 <> rh.134                                      | t(14)=0.666, p=0.516                                                                                                                                                        |
| lh.135 <> rh.136                                      | t(14)=0.219, p=0.830                                                                                                                                                        |
| lh.137 <> rh.138                                      | t(14)=-0.342, p=0.737                                                                                                                                                       |
| lh.139 <> rh.140                                      | t(14)=-0.630, p=0.539                                                                                                                                                       |
| lh.143 <> rh.144                                      | t(14)=-0.208, p=0.838                                                                                                                                                       |
| lh.147 <> rh.148                                      | t(14)=0.122, p=0.904                                                                                                                                                        |

Note: lh left hemisphere; rh right hemisphere.

**Table S4.** Correlations between individual's structural and microstructural bundle properties and bundle-seed FC.

|                | Number of Streamlines    | Tract Volumes          | Fractional Anisotropy (FA) |
|----------------|--------------------------|------------------------|----------------------------|
|                | Ventral forebrain bundle |                        |                            |
| Bundle-seed FC | $r(5)=0.546, p=0.341$    | $r(5)=-0.475, p=0.418$ | $r(5)=-0.227, p=0.713$     |
|                | Midbrain bundle          |                        |                            |
| Bundle-seed FC | $r(4)=-0.847, p=0.153$   | $r(4)=-0.863, p=0.137$ | $r(4)=0.656, p=0.344$      |

**Supplementary Figure****Figure S1.** Visualisation of the ventral forebrain and midbrain as defined by Tovar-Moll and colleagues (2014) using tractography in CD and TDC participants.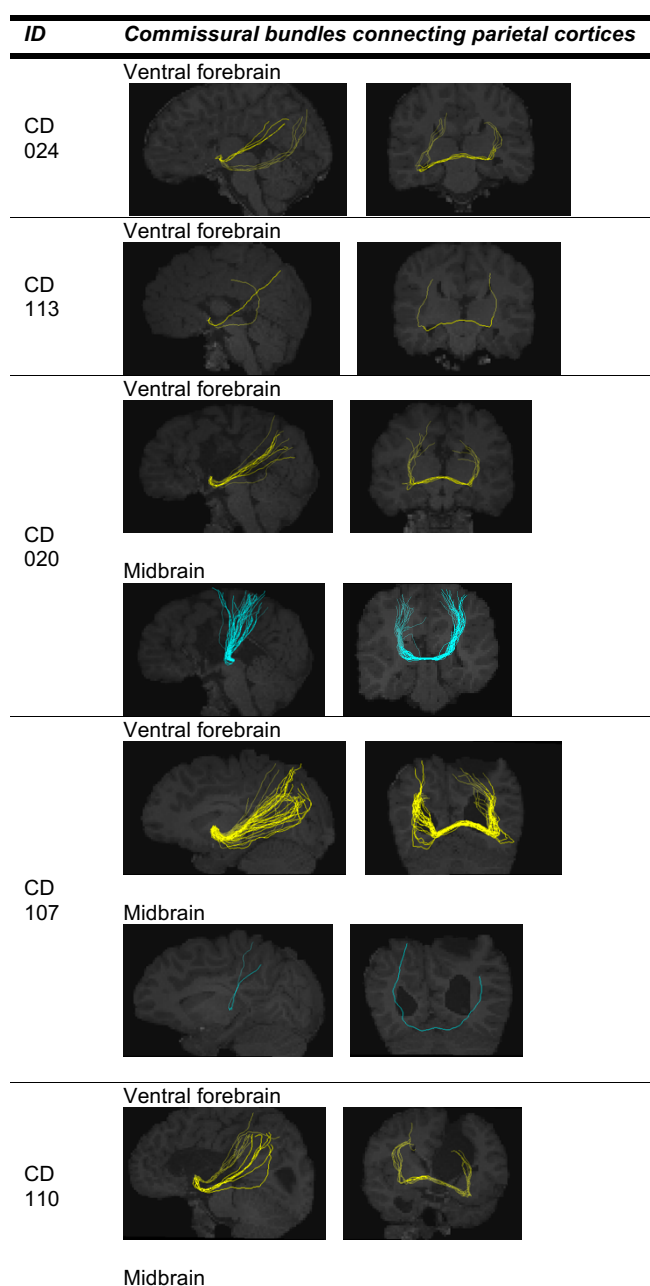

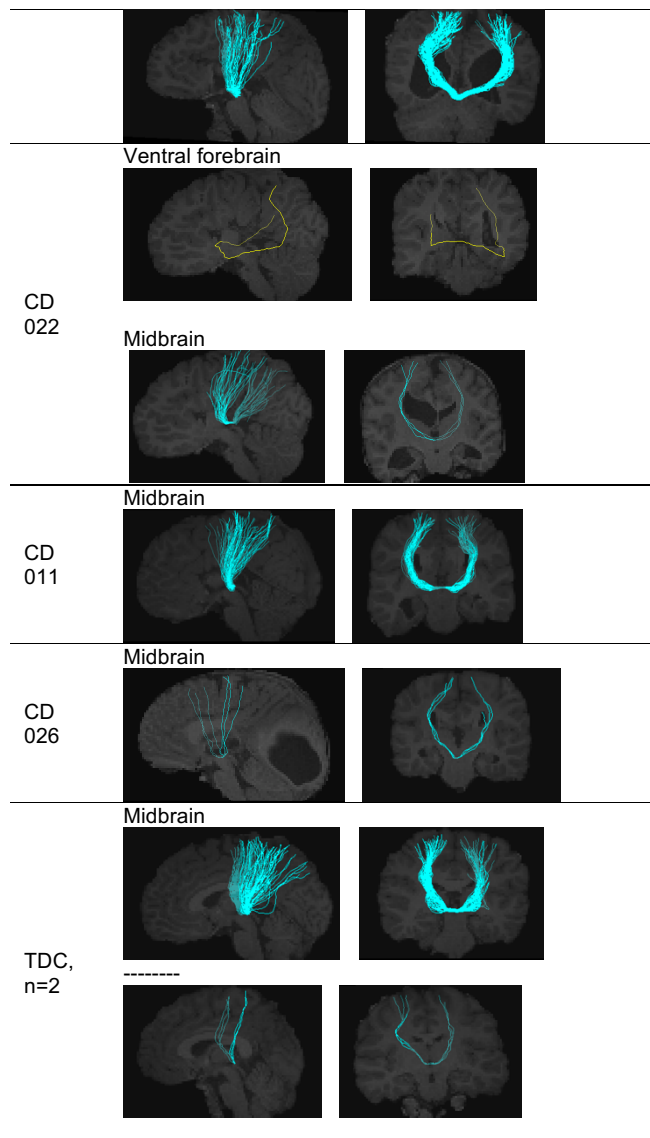

Supplement: DESC-24-e13126-s002.pdf [file DESC-24-e13126-s002.pdf]
